# Supplementary material for: Efficient generation of gene-modified pigs via injection of zygote with Cas9/sgRNA
Source: PubMed Central journal article supplement (PMC4317696; doi:10.1038/srep08256), 2015-02-05
Supplement: srep08256-s1.pdf [file srep08256-s1.pdf]

# **Efficient generation of gene-modified pigs via injection of zygote with Cas9/sgRNA**

Yong Wang<sup>1,8</sup>, Yinan Du<sup>2,8</sup>, Bin Shen<sup>3</sup>, Xiaoyang Zhou<sup>1</sup>, Jian Li<sup>4</sup>, Yu Liu<sup>1</sup>, Jianying Wang<sup>3</sup>, Jiankui Zhou<sup>2</sup>, Bian Hu<sup>2</sup>, Nannan Kang<sup>5</sup>, Jimin Gao<sup>5</sup>, Liqing Yu<sup>6</sup>, Xingxu Huang<sup>2,7\*</sup>, Hong Wei<sup>1,\*</sup>

<sup>1</sup>Department of Laboratory Animal Science, College of Basic Medical Sciences, Third Military Medical University, Chongqing 400038, China.

<sup>2</sup>MOE Key Laboratory of Model Animal for Disease Study, Model Animal Research Center of Nanjing University, National Resource Center for Mutant Mice, Nanjing 210061, China

<sup>3</sup>State Key Laboratory of Reproductive Medicine, Department of Histology and Embryology, Nanjing Medical University, Nanjing 210029, China

<sup>4</sup>Department of Immunology, College of Basic Medical Sciences, Third Military Medical University, Chongqing 400038, China.

<sup>5</sup>School of Laboratory Medicine, Wenzhou Medical University, Wenzhou, Zhejiang 325035, China

<sup>6</sup>Department of Animal and Avian Sciences, University of Maryland, College Park, MD 27042, USA

<sup>7</sup>Shanghai Key Laboratory of Reproductive Medicine, Shanghai 200025, China

<sup>8</sup>These authors contributed equally to this work.

\*Correspondence: [weihong63528@163.com](mailto:weihong63528@163.com) (H.W), [xingxuhuang@mail.nju.edu.cn](mailto:xingxuhuang@mail.nju.edu.cn) (X.H.)

|      |                                                                                                                                                                                                                                                                                                                                                                                   |                                                                                 |
|------|-----------------------------------------------------------------------------------------------------------------------------------------------------------------------------------------------------------------------------------------------------------------------------------------------------------------------------------------------------------------------------------|---------------------------------------------------------------------------------|
| C1-1 | <pre> GCCGCCGCCACCCTGGCCGTGGGCTCCATGTGCGGCGTCTACGGCTCGGCCCTGTGCAACGCCACGCGCTGGCTC GCCGCCGCCACCCTGGCCGTGGGCTCCATGTGC-----AACGCCACGCGCTGGCTC GCCGCCGCCACCCTGGCCGTGGGCTCCATGTGC-----GGCTCGGCCCTGTGCAACGCCACGCGCTGGCTC </pre>                                                                                                                                                         | (WT, 0/14)<br>(-24, 8/14)<br>(-9, 6/14)                                         |
| C1-2 | <pre> GCCGCCGCCACCCTGGCCGTGGGCTCCATGTGCGGCGTCTACGGCTCGGCCCTGTGCAACGCCACGCGCTGGCTC GCCGCCGCCACCCTGGCCGTGGGC-----ACGGCTCGGCCCTGTGCAACGCCACGCGCTGGCTC GCCGCCGCCACCCTGGCCGTGGGCTCCATGTGC-----GGCTCGGCCCTGTGCAACGCCACGCGCTGGCTC </pre>                                                                                                                                                 | (WT, 0/15)<br>(-16, 7/15)<br>(-9, 8/15)                                         |
| C1-4 | <pre> GCCGCCGCCACCCTGGCCGTGGGCTCCATGTGCGGCGTCTACGGCTCGGCCCTGTGCAACGCCACGCGCTGGCTC GCCGCCGCCACCCTGGCCGTGGGCTCCATG-----TACGGCTCGGCCCTGTGCAACGCCACGCGCTGGCTC ----- (-89bp) -----GCAACGCCACGCGCTGGCTC ----- (-104bp,+270bp) -----GCAACGCCACGCGCTGGCTC </pre>                                                                                                                          | (WT, 0/13)<br>(-9, 1/13)<br>(-89, 10/13)<br>(-104, +270, 2/13)                  |
| C2-1 | <pre> GCCGCCGCCACCCTGGCCGTGGGCTCCATGTGCGGCGTCTACGGCTCGGCCCTGTGCAACGCCACGCGCTGGCTC GCCGCCGCCACCCTGGCCGTGGCTCCA-----GCTC       catggagccctggaattgagccagcgtggcgcttgacagggccgagccgtac GCCGCCGCCACCCTGGCCGTGGGCTCCATGTGC-----AACGCCACGCGCTGGCTC GCCGCCGCCACCCTGGCCGTGGCTCC----- (-412bp) ----- </pre>                                                                                  | (WT, 0/14)<br>(-42, +56, 5/14)<br>(-24, 5/14)<br>(-412, 4/14)                   |
| C2-3 | <pre> GCCGCCGCCACCCTGGCCGTGGGCTCCATGTGCGGCGTCTACGGCTCGGCCCTGTGCAACGCCACGCGCTGGCTC GCCGCCGCCACCCTGGCCGTGGCTCCATG-----TGCACGCCACGCGCTGGCTC       ggtcca GCCGCCGCCACCCTGGCCGTGGGCTCCATGTGC-----TCGGCCCTGTGCAACGCCACGCGCTGGCTC GCCGCCGCCACCCTGGCCGTGGGCTCCATGTGCGGCGT-----GGCCCTGTGCAACGCCACGCGCTGGCTC </pre>                                                                         | (WT, 0/14)<br>(-24, +7, 3/14)<br>(-12, 2/14)<br>(-9, 9/14)                      |
| C2-4 | <pre> GCCGCCGCCACCCTGGCCGTGGGCTCCATGTGCGGCGTCTACGGCTCGGCCCTGTGCAACGCCACGCGCTGGCTC GCCGCCGCCACCCTGGCCGTGGGCTCCATGTGC-----GGCTCGGCCCTGTGCAACGCCACGCGCTGGCTC GCCGCCGCCACCCTGGCCGTGGGCTCCATGTG-----CTACGGCTCGGCCCTGTGCAACGCCACGCGCTGGCTC       +535bp </pre>                                                                                                                          | (WT, 0/13)<br>(-9, 12/13)<br>(-6, +535, 1/13)                                   |
| C2-5 | <pre> GCCGCCGCCACCCTGGCCGTGGGCTCCATGTGCGGCGTCTACGGCTCGGCCCTGTGCAACGCCACGCGCTGGCTC GCCGCCGCCACCCTGGCCGTGGGCTC-----TACGGCTCGGCCCTGTGCAACGCCACGCGCTGGCTC GCCGCCGCCACCCTGGCCGTGGGCTCCATGTGCGGCGTCTACGGCTCGGCCCTGTGCAACGCCACGCGCTGGCTC       t GCCGCCGCCACCCTGGCCGTGGGCTCCATG-----TACGGCTCGGCCCTGTGCAACGCCACGCGCTGGCTC GCCGCCGCCACCCTGGCCGTGGGCTCCATGTGC-----AACGCCACGCGCTGGCTC </pre> | (WT, 0/12)<br>(-13, 6/12)<br>(+1, 2/12)<br>(-9, 3/12)<br>(-24, 1/12)            |
| C2-6 | <pre> GCCGCCGCCACCCTGGCCGTGGGCTCCATGTGCGGCGTCTACGGCTCGGCCCTGTGCAACGCCACGCGCTGGCTC GCCGCCGCCACCCT-----GGCTCGGCCCTGTGCAACGCCACGCGCTGGCTC GCCGCCGCCACCCTGGCCGTGGGCTCCATGTGC-----AACGCCACGCGCTGGCTC GCCGCCGCCACCCTGGCCGTGGGCTCCATGTGC-----GGCTCGGCCCTGTGCAACGCCACGCGCTGGCTC       at GCCGCCGCCACCCTGGCCGTGGGCTCCATGTGCGGCG-----CCCTGTGCAACGCCACGCGCTGGCTC       +509bp </pre>         | (WT, 0/13)<br>(-28, 3/13)<br>(-24, 2/13)<br>(-9, +2, 7/13)<br>(-12, +509, 1/13) |

**Figure S1** Sequences of the modified *NpcIII* alleles detected in the live founder pigs

Sequencing results of the modified *NpcIII* alleles detected in the live founder pigs. PCR products of the targeted region of *NpcIII* were amplified from all the founder pigs and sequenced. The PAM sequences are highlighted in green; the targeting sequences in red; the mutations in blue, lower case; deletions (-), and insertions (+). N/N indicates positive colonies out of total sequenced.

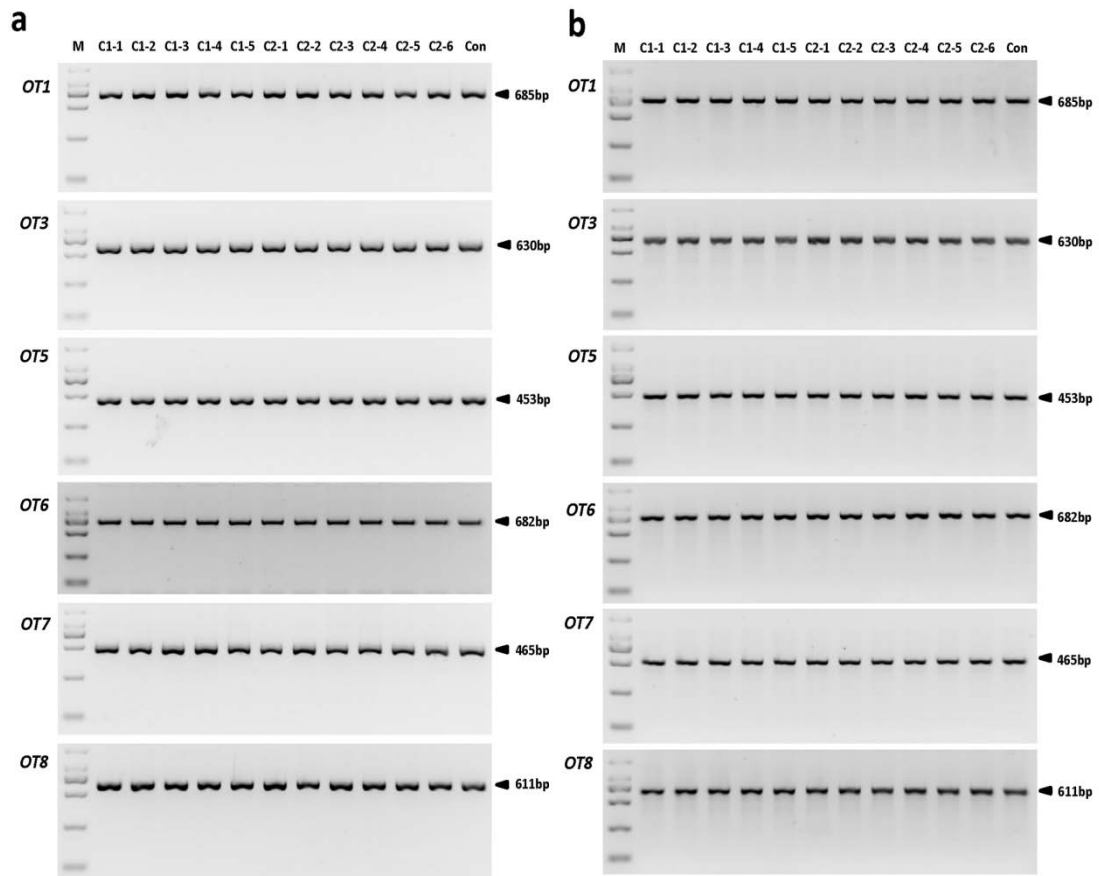

**Figure S2** Detection of the *Npc111* sgRNA:Cas9-mediated off-target cleavages *in vivo*

(a) PCR products of the potential off-target sites of *Npc111* sgRNA:Cas9 from founder pigs.

A total of 8 potential off-target sites most homologous to *Npc111* sgRNA were named OT1 to OT8. OT1, 3, 5~8 were subjected to PCR amplification using genomic DNA from founders.

(b) Detection of *Npc111* sgRNA:Cas9-mediated off-target cleavage by T7EN1 cleavage assay. All PCR products from (a) were subjected to T7EN1 cleavage assay.

**Supplementary Table 1** List of putative off-target sites homologous to *NpcIII*-sgRNA

| Position | 20 | 19 | 18 | 17 | 16 | 15 | 14 | 13 | 12 | 11 | 10 | 9 | 8 | 7 | 6 | 5 | 4 | 3 | 2 | 1 | N | G | G | Location |        |           |           |  |
|----------|----|----|----|----|----|----|----|----|----|----|----|---|---|---|---|---|---|---|---|---|---|---|---|----------|--------|-----------|-----------|--|
| pNpc1L1  | G  | G  | C  | T  | C  | C  | A  | T  | G  | T  | G  | C | G | G | C | G | T | C | T | A | C | G | G | Chro.    | Strand | Start     | End       |  |
| OT1      | G  | G  | C  | T  | C  | C  | A  | T  | G  | T  | G  | C | A | G | A | G | G | C | T | A | C | A | G | 1        | +      | 55561919  | 55561942  |  |
| OT2      | G  | G  | C  | T  | C  | T  | G  | T  | T  | T  | G  | C | G | G | C | G | T | C | T | A | A | A | G | 6        | -      | 151976910 | 151976933 |  |
| OT3      | G  | G  | C  | T  | G  | C  | A  | T  | G  | T  | G  | C | G | G | C | G | T | A | T | G | G | A | G | 7        | +      | 53582684  | 53582707  |  |
| OT4      | G  | G  | C  | C  | C  | C  | G  | T  | G  | C  | G  | C | A | G | C | G | T | C | T | A | C | A | G | 8        | -      | 631994    | 632017    |  |
| OT5      | G  | G  | C  | T  | C  | C  | A  | C  | C  | T  | G  | C | G | G | C | G | T | A | T | A | G | A | G | 9        | +      | 8212187   | 8212210   |  |
| OT6      | G  | G  | C  | T  | C  | C  | A  | T  | G  | G  | G  | C | G | G | C | G | C | C | T | C | C | G | G | 10       | +      | 44897687  | 44897710  |  |
| OT7      | T  | G  | C  | T  | C  | C  | A  | T  | G  | C  | C  | C | T | G | C | G | T | C | T | A | C | A | G | 16       | -      | 82099593  | 82099616  |  |
| OT8      | G  | G  | C  | T  | A  | C  | A  | T  | G  | T  | G  | C | T | G | C | G | T | C | T | T | C | A | G | 18       | -      | 23387983  | 23388006  |  |

PAM is shaded in pink, NAG is highlighted. Bases identical to sgRNA are shaded in red.

**Supplementary Table 2** Oligonucleotides for generating *Npc111*-sgRNA expression vector

|                                    |                           |
|------------------------------------|---------------------------|
| <i>Npc111</i> -sgRNA top strand    | 5'-TAGGCTCCATGTGCGGCGTCTA |
| <i>Npc111</i> -sgRNA bottom strand | 5'-AAACTAGACGCCGCACATGGAG |

**Supplementary Table 3** Primers for genotyping and amplifying Cas9/sgRNA-targeted*Npc111* fragment

| Name        | Sequence                   | Amplicon |
|-------------|----------------------------|----------|
| pNpc111 For | 5'-TGCATTGCCACAACACCTGCAGC | 648      |
| pNpc111 Rev | 5'-TGCTAAGGAGGCTGTAGGTGGAG |          |

**Supplementary Table 4** Sequences of primers for PCR amplification of *Npc111*

sgRNA:Cas9 off-target sites

| Name    | Sequence                   | Amplicon |
|---------|----------------------------|----------|
| OT1 For | 5'-GGAGACACCTTGAGACTTCAGA  | 685      |
| OT1 Rev | 5'-CCAGGAACCTTGTGAGGAATGC  |          |
| OT2 For | 5'-ATCTGGTCGTCTGTCTTAGGTT  | 681      |
| OT2 Rev | 5'-GCACAGGTATTCTCATCACAATC |          |
| OT3 For | 5'-AGACTGCCAGCAGACAACCAA   | 630      |
| OT3 Rev | 5'-GAGCCGCATCTGTGACCTACA   |          |
| OT4 For | 5'-AGGCAACAGTTGGCATCCATAAC | 757      |
| OT4 Rev | 5'-TGAGATGAAGACGGAGCGACTC  |          |
| OT5 For | 5'-CTATGAAGACAGTGAATGACTC  | 453      |
| OT5 Rev | 5'-CAGGATAGAAGTTCCCGACAT   |          |
| OT6 For | 5'-TTGAGTGAGTGTGAATGTTCTG  | 682      |
| OT6 Rev | 5'-CAGTCCAAAGCATAAACCTAATC |          |
| OT7 For | 5'-GCTTCCFTTCCGACTGCCTATGT | 465      |
| OT7 Rev | 5'-GGTGTGCTGCTCGTGCCCTAAT  |          |
| OT8 For | 5'-TGGAGACCTGACTTCATCTAGG  | 611      |
| OT8 Rev | 5'-GGCATCTGAGATAGGAGCATTC  |          |
